# Supplementary material
Source: ML conference proceedings conference paper supplement (https://openreview.net/forum?id=PZf4RsPMBG)

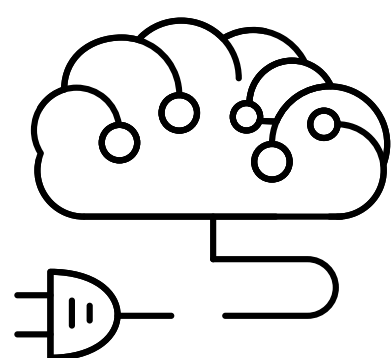

# HyperAgent

Generalist Software Agent

Supplement: supplementary_material [file attachment]

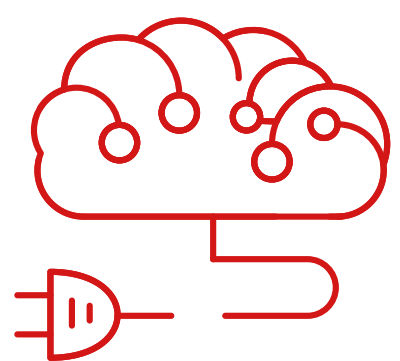

# HyperAgent

Generalist Software Agent

Supplement: supplementary_material [file attachment]

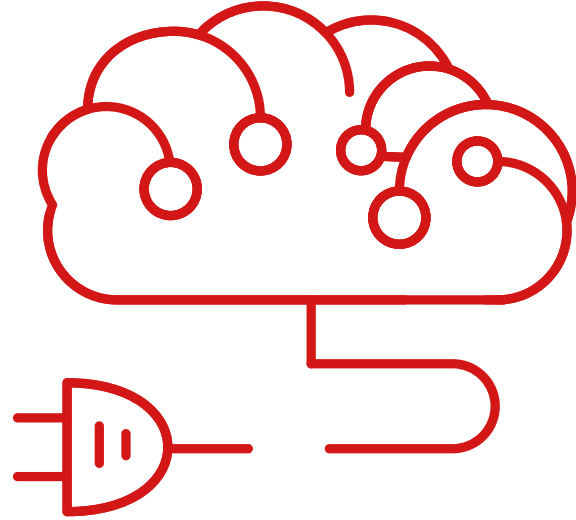

# HyperAgent

Generalist Software Agent

Supplement: supplementary_material [file attachment]

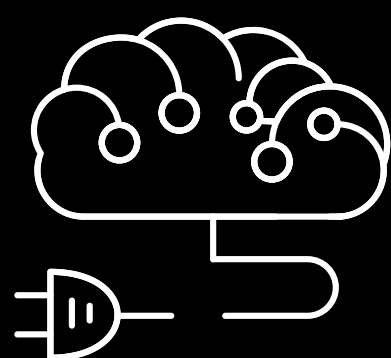

# HyperAgent

Generalist Software Agent

Supplement: supplementary_material [file attachment]
